# Supplementary material
Source: PubMed Central journal article supplement (PMC5733651)
Supplement: Supp_Table1.pdf [file Supp_Table1.pdf]

## Supplementary Data

**Supplementary Table S1.** *Antibodies to AAV and hCNGB3 after subretinal injection of AAV5-PR2.1-hCNGB3 and AAV5-PR2.1-cCNGB3 in CNGB3-mutant dogs*

| Animal ID | Vector dose (vg/eye) | Antibodies to AAV |         | Antibodies to hCNGB3 |          |
|-----------|----------------------|-------------------|---------|----------------------|----------|
|           |                      | Pretreatment      | Week 12 | Pretreatment         | Week 12  |
| M728      | $5 \times 10^{11}$   | 40                | 160     | Negative             | Negative |
| M729      | $5 \times 10^{11}$   | 20                | 40      | Negative             | Negative |
| M730      | $5 \times 10^{11}$   | 20                | 160     | Negative             | Negative |
| M731      | $5 \times 10^{10}$   | 20                | 40      | Negative             | Negative |
| M732      | $5 \times 10^{10}$   | 20                | 40      | Negative             | Negative |
| M733      | $5 \times 10^{10}$   | 20                | 80      | Negative             | Negative |

Each animal had a subretinal injection of AAV5-PR2.1-*hCNGB3* in one eye and AAV5-PR2.1-*cCNGB3* in the other eye. For AAV, results are expressed as the reciprocal of the highest serum dilution that inhibited expression of the  $\beta$ -galactosidase transgene by  $\geq 50\%$ . Antibodies to hCNGB3 were measured by ELISA. Canine CNGB3 protein was not available to use in antibody testing.
