# Supplementary material
Source: PubMed Central journal article supplement (PMC5733651)
Supplement: Supp_Table2.pdf [file Supp_Table2.pdf]

**Supplementary Table S2. ELISPOT responses to AAV or CNGB3 peptides after subretinal injection of AAV5-PR2.1-hCNGB3 or AAV5-PR2.1-cCNGB3 in CNGB3-mutant dogs**

| Animal ID | Study week | Vector dose (vg/eye) | SFU/million PBMC |      |    |           |             |           |    |    |              |           |    |    | SFU/20,000 PBMC<br>PMA/ionomycin |
|-----------|------------|----------------------|------------------|------|----|-----------|-------------|-----------|----|----|--------------|-----------|----|----|----------------------------------|
|           |            |                      | Medium           | AAV5 |    |           | Human CNGB3 |           |    |    | Canine CNGB3 |           |    |    |                                  |
|           |            |                      |                  | A    | B  | C         | A           | B         | C  | D  | A            | B         | C  | D  |                                  |
| M730      | 6          | $5 \times 10^{11}$   | 5                | 20   | 50 | 25        | 25          | 35        | 25 | 45 | <b>80</b>    | 30        | 0  | NT | 54                               |
| M728      | 12         | $5 \times 10^{11}$   | 15               | 35   | 40 | 35        | 40          | <b>55</b> | 20 | 40 | 15           | 30        | 45 | 30 | 149                              |
| M729      | 12         | $5 \times 10^{11}$   | 15               | 15   | 25 | 35        | 30          | <b>55</b> | 35 | 30 | <b>65</b>    | <b>60</b> | 30 | 30 | 219                              |
| M730      | 12         | $5 \times 10^{11}$   | 8                | 40   | 50 | <b>68</b> | 40          | <b>68</b> | 38 | 28 | 25           | 48        | 53 | 25 | 149                              |
| M731      | 12         | $5 \times 10^{10}$   | 8                | 10   | 25 | 23        | 23          | 18        | 18 | 3  | 3            | 5         | 35 | 5  | 94                               |
| M732      | 12         | $5 \times 10^{10}$   | 25               | 50   | 18 | 0         | 18          | 20        | 13 | 5  | 8            | 8         | 15 | 8  | 229                              |
| M733      | 12         | $5 \times 10^{10}$   | 48               | 38   | 25 | 13        | 25          | 23        | 20 | 13 | 15           | 15        | 23 | 15 | 158                              |

Results are expressed as the number of spot-forming cells (SFU) per the indicated number of peripheral blood mononuclear cells (PBMC). Positive responses ( $\geq 55$  SFU/million PBMC and more than three times the medium control value) are shown in **bold**.

PMA, phorbol myristic acid; AAV5, adeno-associated virus serotype 5; CNGB3, cyclic nucleotide gated channel beta subunit; NT, not tested. A, B, C, and D designate pools of peptides used for stimulation of T cells in the ELISPOT assay.
